# Supplementary material for: MiR-494 acts as a tumor promoter by targeting CASP2 in non-small cell lung cancer
Source: PubMed Central journal article supplement (PMC6395740; doi:10.1038/s41598-019-39453-2), 2019-02-28
Supplement: 41598_2019_39453_MOESM1_ESM.pdf [file 41598_2019_39453_MOESM1_ESM.pdf]

**MiR-494 acts as a tumor promoter by targeting CASP2 in  
non-small cell lung cancer**

Qiao Zhang<sup>1</sup>, Yan Li<sup>1</sup>, Mei Zhao<sup>1</sup>, Hong Lin<sup>1</sup>, Wenjie Wang<sup>1</sup>, Dongdong  
Li<sup>1</sup>, Wei Cui<sup>2</sup>, Caihong Zhou<sup>3</sup>, Jialing Zhong<sup>4\*</sup> & Changzhi Huang<sup>1\*</sup>

<sup>1</sup>Department of Etiology and Carcinogenesis, State Key Laboratory of Molecular Oncology, Beijing Key Laboratory for Carcinogenesis and Cancer Prevention, National Cancer Center/National Clinical Research Center for Cancer/Cancer Hospital, Chinese Academy of Medical Sciences and Peking Union Medical College, Beijing, 100021, China

<sup>2</sup>Department of Clinical Laboratory, National Cancer Center/National Clinical Research Center for Cancer/Cancer Hospital, Chinese Academy of Medical Sciences and Peking Union Medical College, Beijing, 100021, China

<sup>3</sup>Department of Education, National Cancer Center/National Clinical Research Center for Cancer/Cancer Hospital, Chinese Academy of Medical Sciences and Peking Union Medical College, Beijing, 100021, China

<sup>4</sup>Department of Laboratory Medicine, Sichuan Academy of Medical Science and Sichuan Provincial People's Hospital, Chengdu, 610072, Sichuan Province, China

**Address correspondence to:** Changzhi Huang, E-mail: huangpumc@163.com, huangcz@cicams.ac.cn or Jialing Zhong, E-mail: zhongjl03@163.com.

Supplementary data

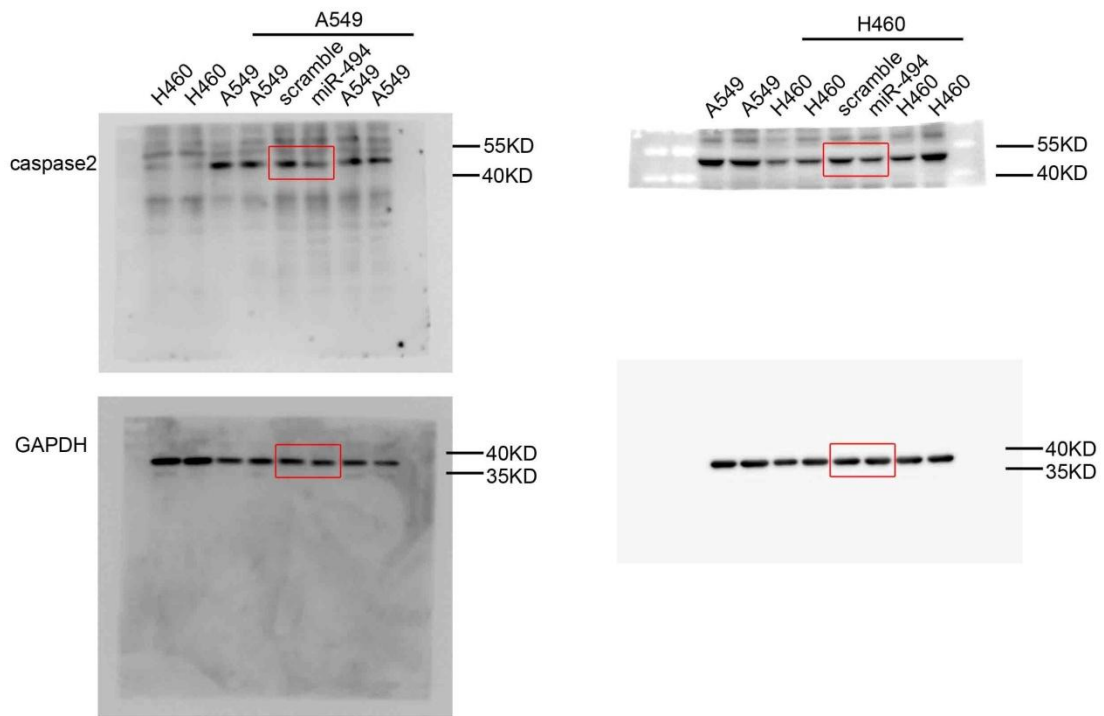

Supplemental Fig 1 The whole PVDF membrane stainings for the western blot data in Figure 5d were presented above. Images were cropped as the indication of red lines.

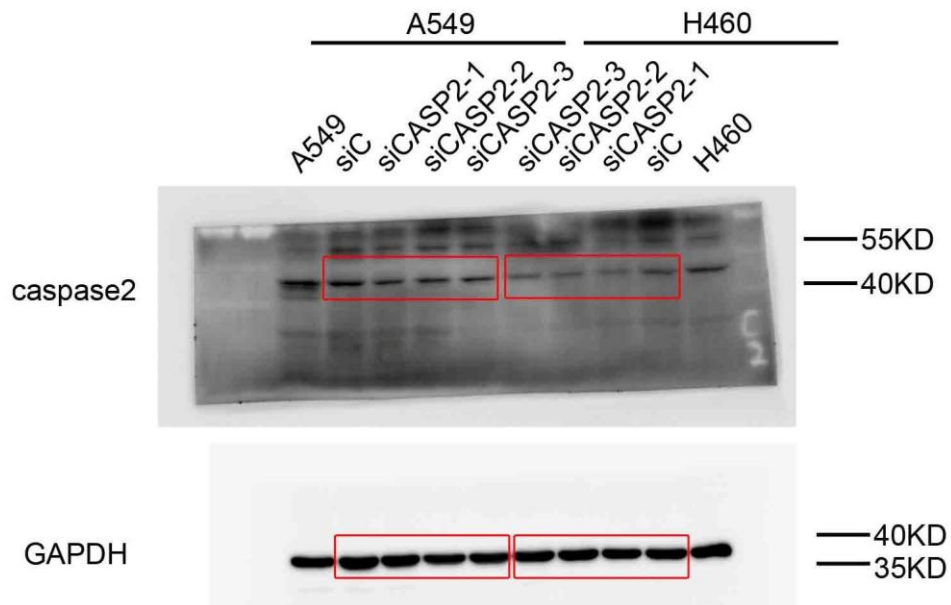

Supplemental Fig 2 The whole PVDF membrane stainings for the western blot data in Figure 6b and 6c were presented above. Images were cropped as the indication of red lines.

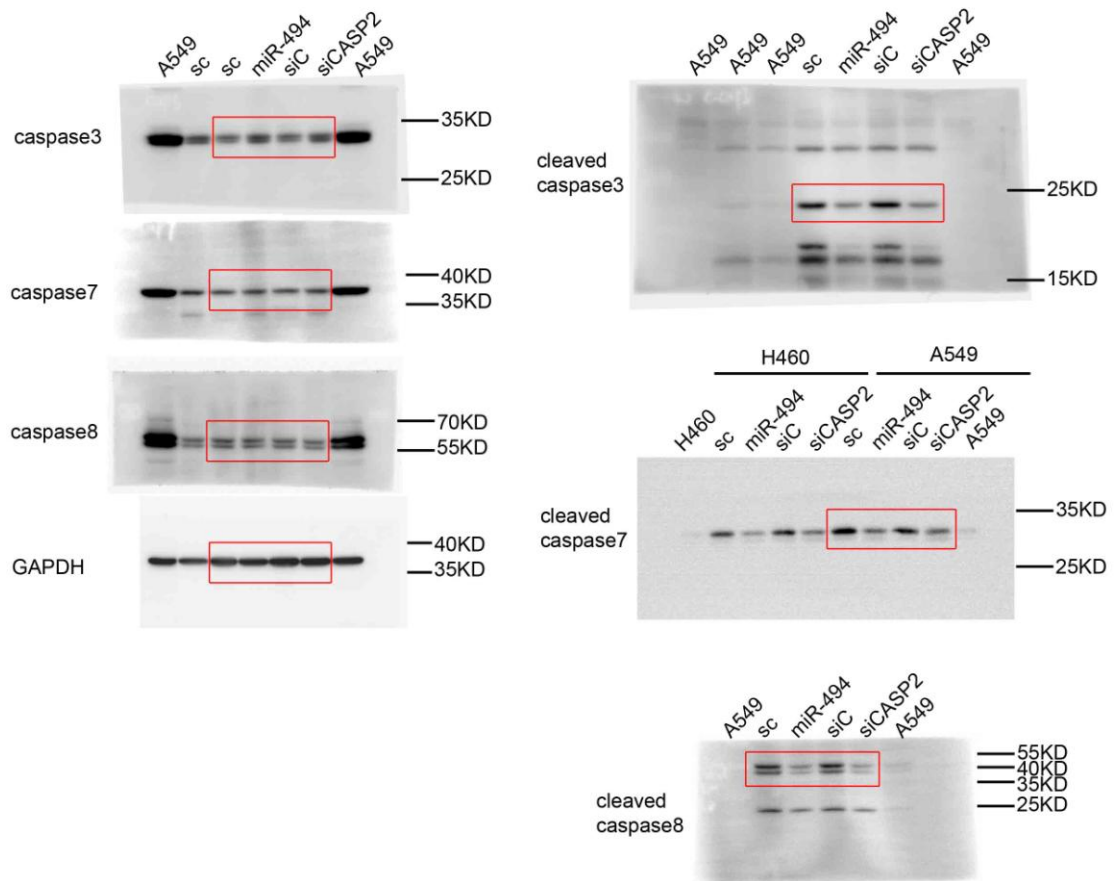

Supplemental Fig 3 The whole PVDF membrane stainings for the western blot data in Figure 7a were presented above. Images were cropped as the indication of red lines.

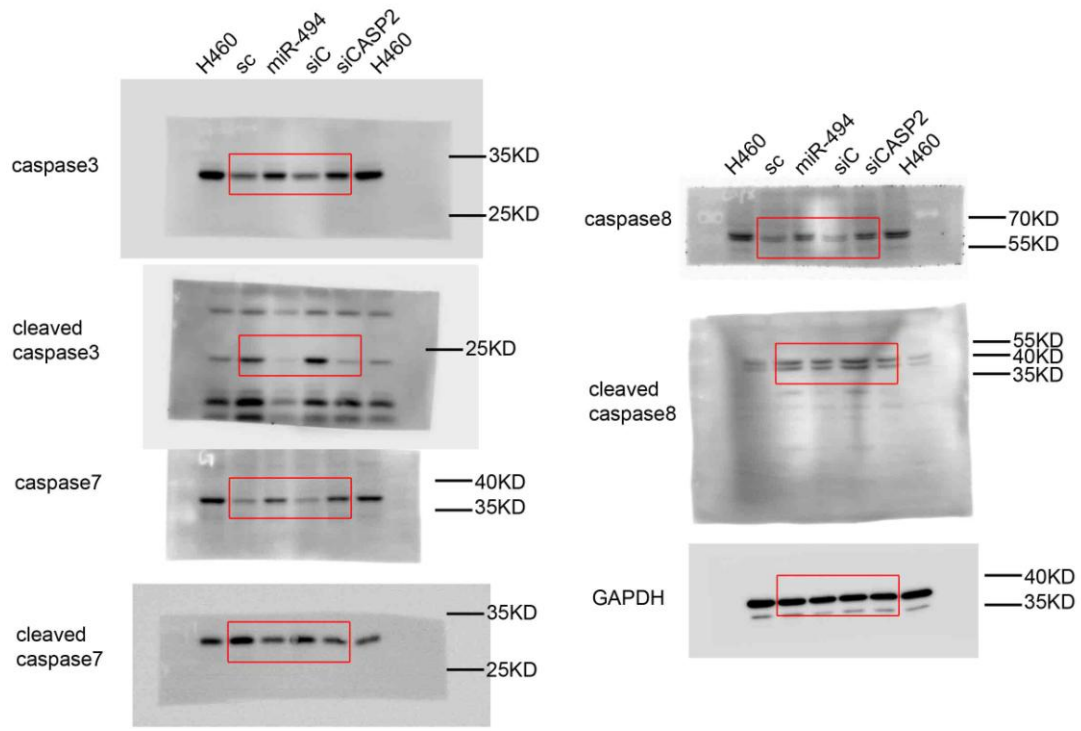

Supplemental Fig 4 The whole PVDF membrane stainings for the western blot data in Figure 7b were presented above. Images were cropped as the indication of red lines.
